# Supplementary material for: Polymorphism and benzene solvent controlled stimuli responsive reversible fluorescence switching in triphenylphosphoniumfluorenylide crystals
Source: Royal Society of Chemistry journal article supplement (doi:10.1039/c7nj01136a), 2017-01-01
Supplement: c7nj01136a1.pdf [file c7nj01136a1.pdf]

## Polymorphism and benzene solvent controlled stimuli responsive reversible fluorescence switching in triphenylphosphoniumfluorenylide crystals

P. S. Hariharan,<sup>a</sup> M. Baby Mariyatra,<sup>b</sup> E. M. Mothi,<sup>c\*</sup> Antonia Neels,<sup>d</sup> Georgina Rosair<sup>e</sup> and Savarimuthu Philip Anthony<sup>a\*</sup>

<sup>a</sup>)Department of Chemistry, School of Chemical & Biotechnology, SASTRA University, Thanjavur-613401, Tamil Nadu, India. E-mail: [philip@biotech.sastra.edu](mailto:philip@biotech.sastra.edu).

<sup>b</sup>)Department of Chemistry, St. Xavier's College, Palayamkottai-627002, India

<sup>c</sup>)Centre for Scientific and Applied Research, PSN College of Engineering and Technology, Melathediyoore, Tirunelveli-627152, India. E-mail: [mothichem@gmail.com](mailto:mothichem@gmail.com)

<sup>d</sup>)Center for X-ray Analytics, Empa - Swiss Federal Laboratories for Materials Science and Technology, Überlandstrasse 129, 8600 Dübendorf, Switzerland

<sup>e</sup>)Institute of Chemical Sciences, School of Engineering & Physical Sciences, Heriot-Watt University, Edinburgh EH14 4AS, United Kingdom.

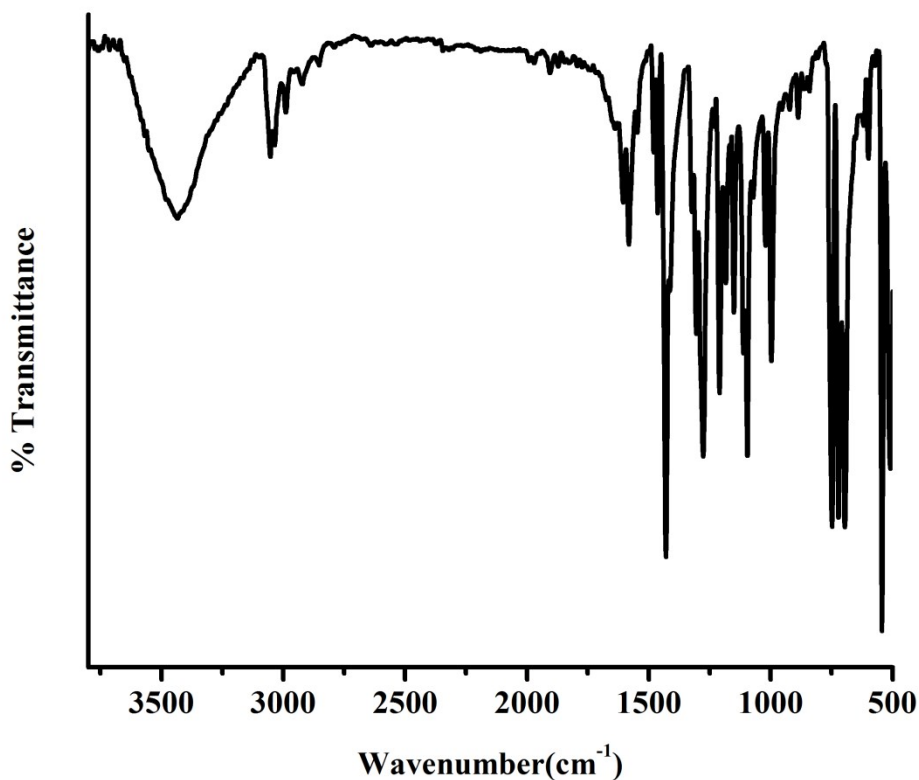

Figure S1. FTIR of TPPFY.

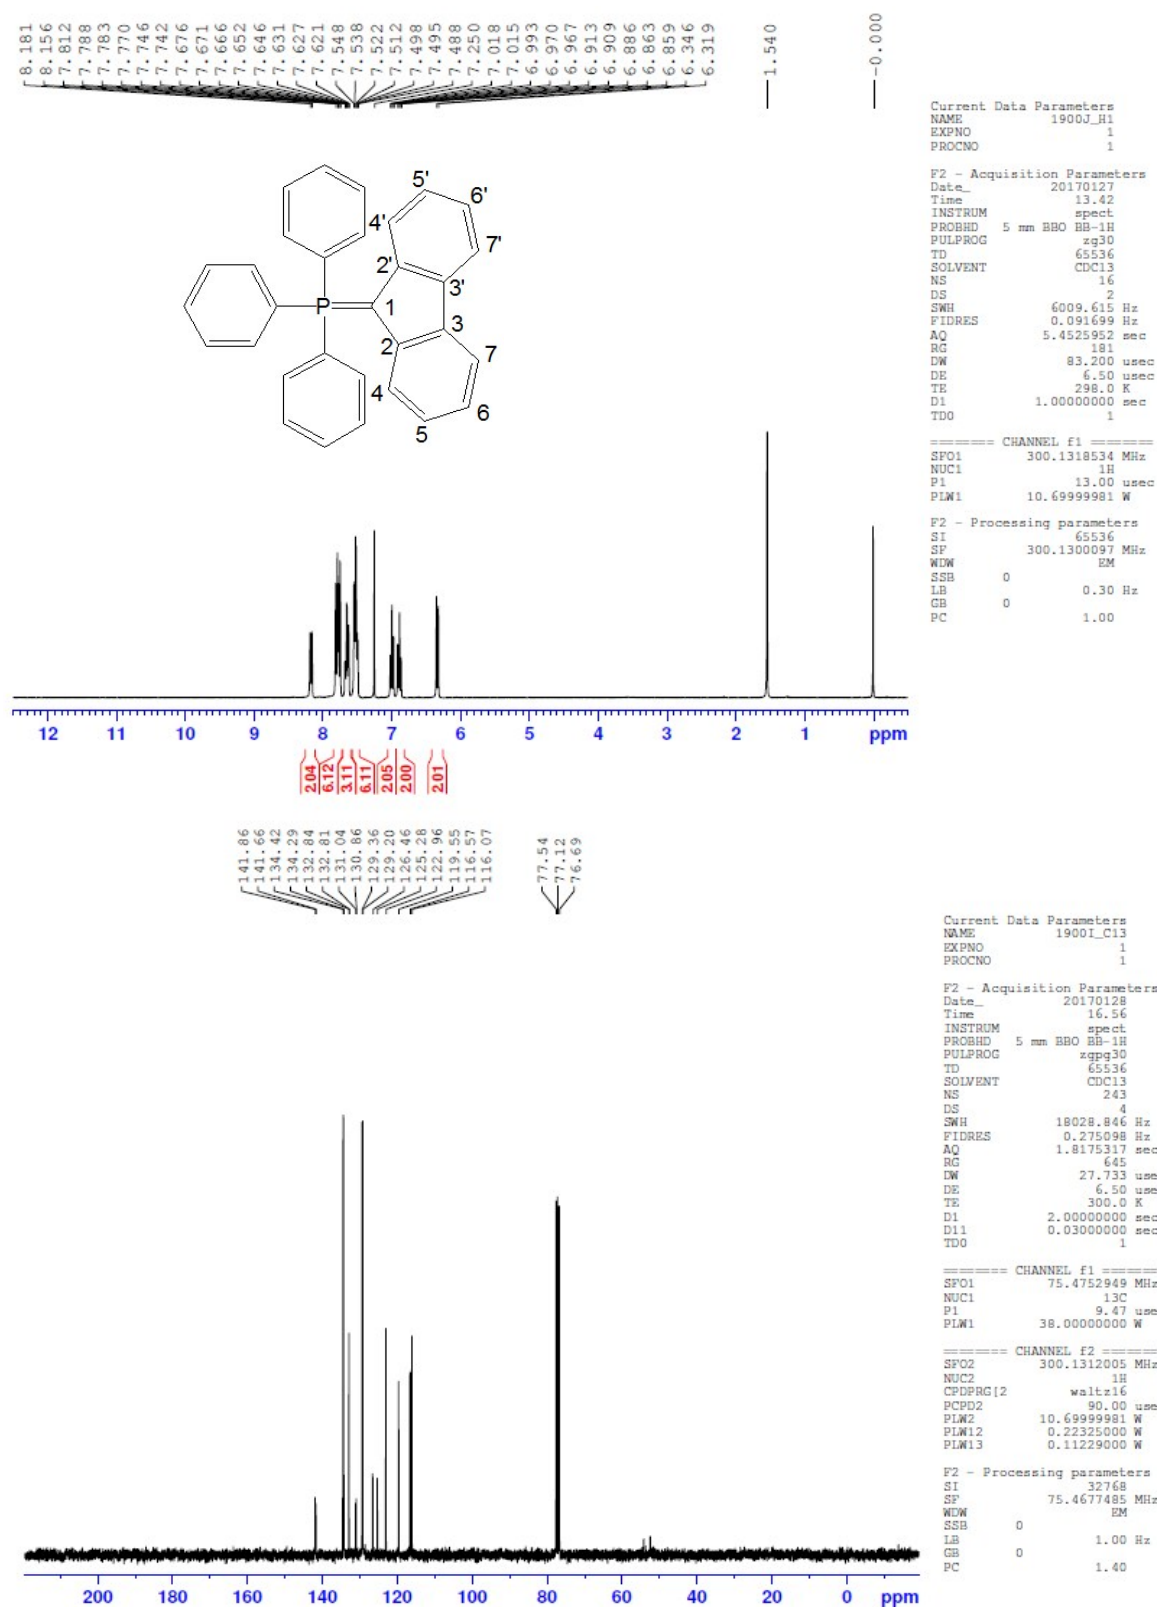

Fig. S2. <sup>1</sup>H and <sup>13</sup>C-NMR spectra of TPPFY.

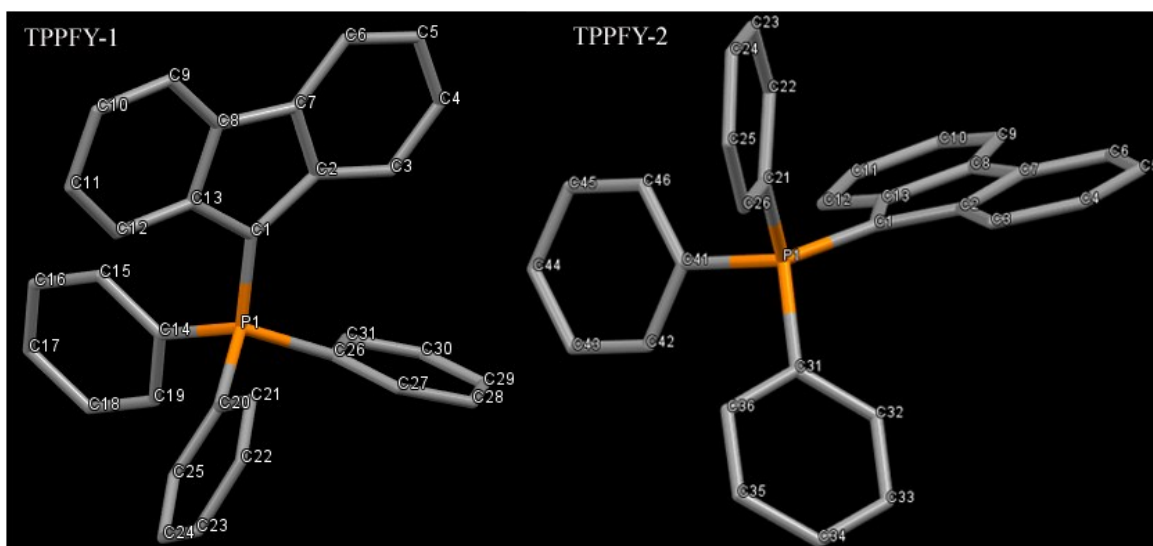

Fig. S3. Molecular structure of TPPFY in TPPFY-1 and TPPFY-2 crystal lattice. C (grey), P (orange). H-atoms are omitted for clarity.

Table S1. Geometric parameters around P atom for TPPFY-1 and TPPFY-2.

| Bond distances (Å) | TPPFY-1    | Bond distances (Å) | TPPFY-2    |
|--------------------|------------|--------------------|------------|
| P1-C1              | 1.7160(19) | P1-C1              | 1.7237(15) |
| P1-C14             | 1.810(2)   | P1-C21             | 1.8233(15) |
| P1-C20             | 1.8175(18) | P1-C31             | 1.8096(15) |
| P1-C26             | 1.797(2)   | P1-C41             | 1.8065(16) |
| Bond angles (deg)  |            | Bond angles (deg)  |            |
| C1-P1-C14          | 115.74(9)  | C1-P1-C21          | 109.67(7)  |
| C1-P1-C20          | 110.78(9)  | C1-P1-C31          | 113.78(7)  |
| C1-P1-C26          | 110.33(9)  | C1-P1-C41          | 111.33(7)  |
| C14-P1-C20         | 105.36(8)  | C21-P1-C31         | 106.97(7)  |
| C14-P1-C26         | 106.94(9)  | C21-P1-C41         | 108.14(7)  |
| C20-P1-C26         | 107.26(9)  | C31-P1-C41         | 106.71(7)  |

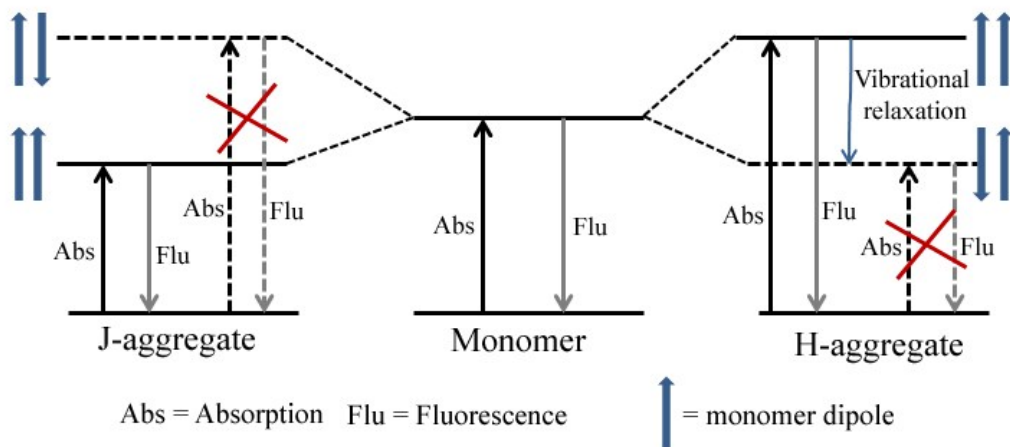

Scheme S1. Exciton splitting in H- and J-aggregate (forbidden transition is indicated by red cross).

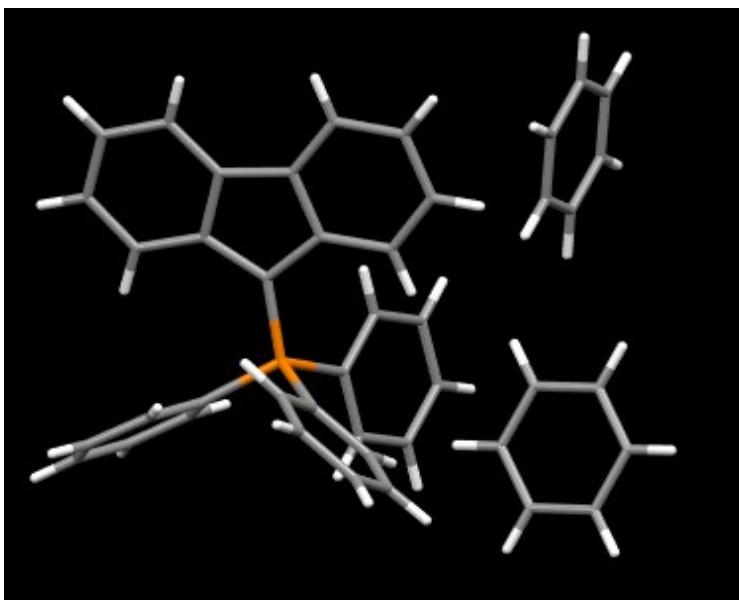

Fig. S4. Molecular structure of TPPFY-2 with benzene molecules included in the crystal lattice. C (grey), P (orange), H (white).

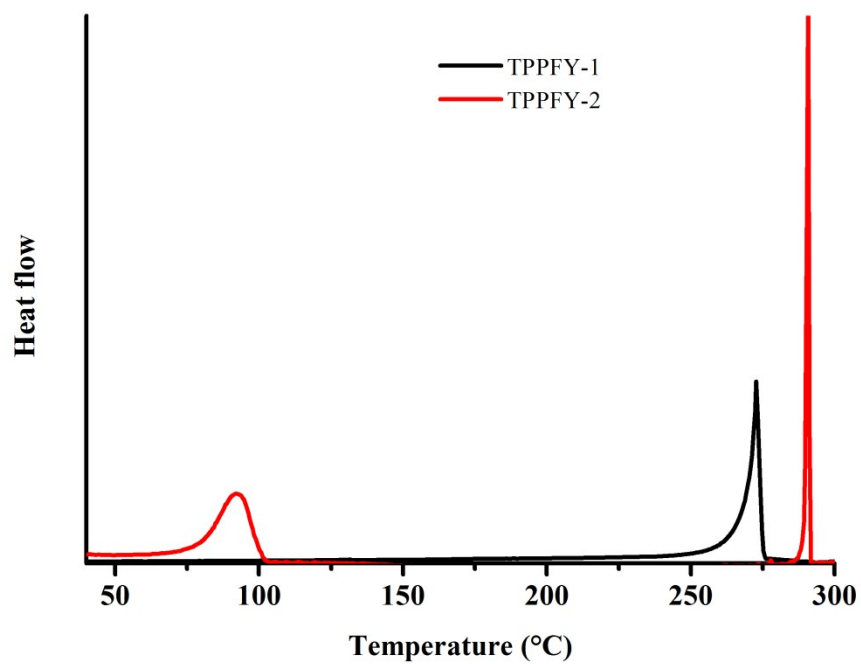

Figure S5. DSC spectrum of TPPFY-1 and TPPFY-2.

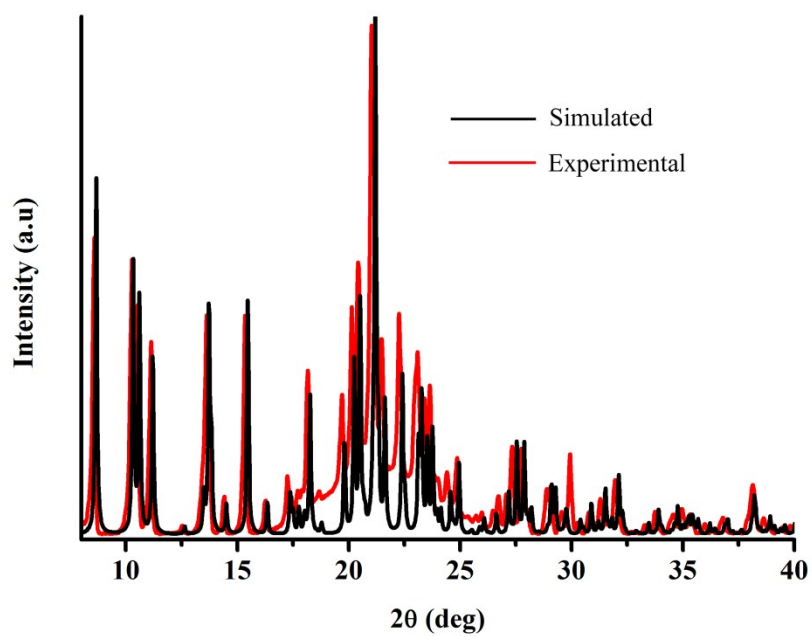

Fig. S6. PXRD pattern of TPPFY-1

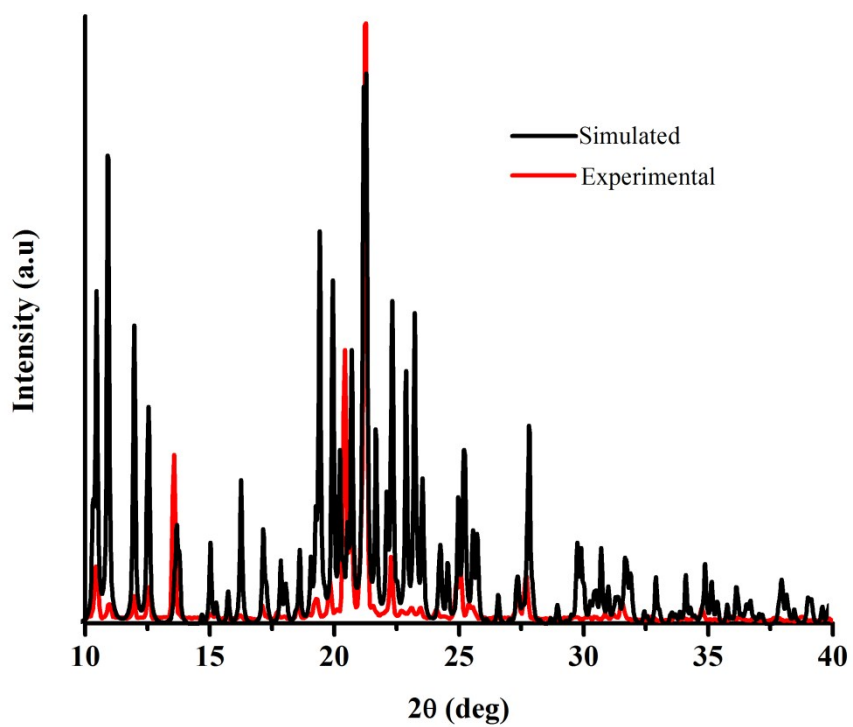

Fig. S7. PXRd pattern of TPPFY-2.
